# Supplementary material
Source: MDPI journal article supplement (https://www.mdpi.com/2227-9717/9/5/743)
Supplement: s1 [file s1]

## **Optimization of bioactive extraction from *Pleurotus ostreatus* by experimental design and evaluation of *in vitro* antioxidant and antimicrobial activities**

**Federica Ianni <sup>1§</sup>, Francesca Blasi <sup>1§</sup>, Paola Angelini <sup>2\*</sup>, Giancarlo Angeles Flores <sup>2</sup>, Lina Cossignani <sup>1,3\*</sup>, Roberto Venanzoni <sup>2</sup>**

<sup>1</sup> Department of Pharmaceutical Sciences, University of Perugia, 06126 Perugia, Italy

<sup>2</sup> Department of Chemistry, Biology and Biotechnology, University of Perugia, 06122 Perugia, Italy

<sup>3</sup> Center for Perinatal and Reproductive Medicine, University of Perugia, Santa Maria della Misericordia University Hospital, Sant'Andrea Delle Fratte, Perugia, 06132, Italy

§Both authors contributed equally to this work

\*paola.angelini@unipg.it; Tel.: +39 0755857346

\*lina.cossignani@unipg.it; Tel.: +39 0755857959

---

**Table S1.** Worksheet with the independent variables set for ultrasound assisted extraction (UAE).

| Sample # | Independent Variables           |                               |               |                     |
|----------|---------------------------------|-------------------------------|---------------|---------------------|
|          | Solvent (water %<br>in ethanol) | Solvent/solid<br>ratio (mL/g) | Time<br>(min) | Temperature<br>(°C) |
| 1        | 0                               | 10                            | 10            | 30                  |
| 2        | 50                              | 10                            | 10            | 30                  |
| 3        | 0                               | 60                            | 10            | 30                  |
| 4        | 50                              | 60                            | 10            | 30                  |
| 5        | 0                               | 10                            | 60            | 30                  |
| 6        | 50                              | 10                            | 60            | 30                  |
| 7        | 0                               | 60                            | 60            | 30                  |
| 8        | 50                              | 60                            | 60            | 30                  |
| 9        | 0                               | 10                            | 10            | 60                  |
| 10       | 50                              | 10                            | 10            | 60                  |
| 11       | 0                               | 60                            | 10            | 60                  |
| 12       | 50                              | 60                            | 10            | 60                  |
| 13       | 0                               | 10                            | 60            | 60                  |
| 14       | 50                              | 10                            | 60            | 60                  |
| 15       | 0                               | 60                            | 60            | 60                  |
| 16       | 50                              | 60                            | 60            | 60                  |
| 17       | 25                              | 35                            | 35            | 45                  |
| 18       | 25                              | 35                            | 35            | 45                  |
| 19       | 25                              | 35                            | 35            | 45                  |

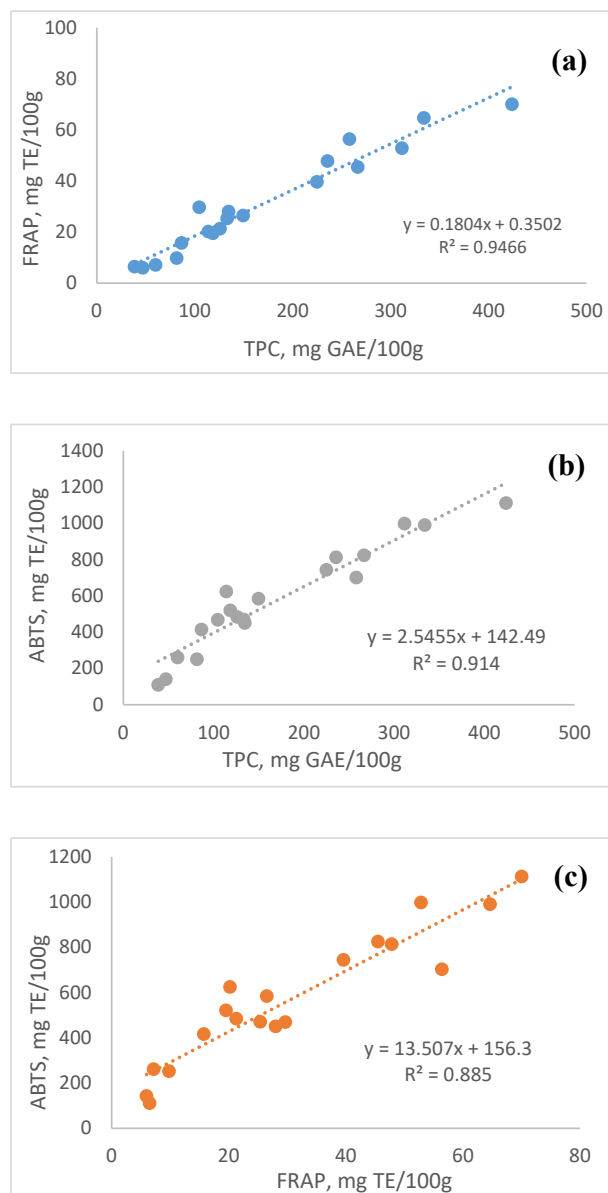

**Figure S1.** Correlation between **(a)** TPC and FRAP values, **(b)** TPC and ABTS values, **(c)** FRAP and ABTS values of the 19 extracts from *P. ostreatus*.

Table S2. GenBank sequences used for *Pleurotus ostratus* PeruMyc strains identification (accession no., sample no., and locality together with sequences length and identity percentage with *P. ostreatus* PeruMyc2412 strain were reported).

| Species             | Accession no. | Sample no.  | Locality                    | % Identity | Sequence length<br>blasted (bp) |
|---------------------|---------------|-------------|-----------------------------|------------|---------------------------------|
| <i>P. ostreatus</i> | MW846257      | PeruMyc2412 | Cima di Tuoro (PG, Italy)   | 100        | 646                             |
| <i>P. ostreatus</i> | MW846237      | PeruMyc2475 | Castel Porziano (RM, Italy) | 99.53      | 646                             |
| <i>P. ostreatus</i> | KY9624412     | P1          | South Korea                 | 100        | 665                             |
| <i>P. ostreatus</i> | MK542618      | DMRP-30     | India                       | 100        | 653                             |
| <i>P. ostreatus</i> | KX449514      | Champ-110   | France                      | 100        | 657                             |
| <i>P. ostreatus</i> | KR867641      | MF11-13     | Germany                     | 99.84      | 648                             |

**Table S3.** Correlation (measured as R<sup>2</sup> value) between the antimicrobial activity with the total phenol content (TPC) and antioxidant activity (DPPH, ABTS, FRAP).

| Strains (ID)                         | Correlation coefficient (R <sup>2</sup> ) |        |        |        |
|--------------------------------------|-------------------------------------------|--------|--------|--------|
|                                      | TPC                                       | DPPH   | ABTS   | FRAP   |
| <i>C. tropicalis</i> (DBVPG 6184)    | 0.5121                                    | 0.9367 | 0.7316 | 0.6507 |
| <i>C. albicans</i> (DBVPG 6379)      | 0.5307                                    | 0.9275 | 0.739  | 0.6682 |
| <i>C. parapsilopsis</i> (DBVPG 6551) | 0.6065                                    | 0.9272 | 0.8589 | 0.7382 |
| <i>C. albicans</i> (DBVPG 6183)      | 0.6065                                    | 0.9272 | 0.8589 | 0.7382 |
| <i>E. coli</i> (ATCC 10536)          | 0.1919                                    | 0.9399 | 0.4652 | 0.3141 |
| <i>E. coli</i> (PeruMycA 2)          | 0.0502                                    | 0.7426 | 0.2058 | 0.1262 |
| <i>E. coli</i> (PeruMycA 3)          | 0.1028                                    | 0.8382 | 0.3087 | 0.2017 |
| <i>P. aeruginosa</i> (PeruMycA 5)    | 0.1061                                    | 0.8714 | 0.3414 | 0.2073 |
| <i>S. typhi</i> (PeruMycA 7)         | 0.1071                                    | 0.8818 | 0.3531 | 0.2089 |
| <i>B. cereus</i> (PeruMycA 4)        | 0.0428                                    | 0.7959 | 0.2426 | 0.1172 |
| <i>B. subtilis</i> (PeruMycA 6)      | 0.0151                                    | 0.7248 | 0.1744 | 0.0681 |
| <i>S. aureus</i> (ATCC 6538)         | 0.0281                                    | 0.7225 | 0.1787 | 0.0914 |
| <i>T. mentagrophytes</i> (CCF 4823)  | 0.1902                                    | 0.9492 | 0.4779 | 0.3123 |
| <i>T. tonsurans</i> (CCF 4834)       | 0.8114                                    | 0.7687 | 0.9485 | 0.9059 |
| <i>T. rubrum</i> (CCF 4879)          | 0.6589                                    | 0.8743 | 0.8226 | 0.7847 |
| <i>T. rubrum</i> (CCF 4933)          | 0.5553                                    | 0.8761 | 0.7007 | 0.6876 |
| <i>A. crocatum</i> (CCF 5300)        | 0.1683                                    | 0.7442 | 0.2889 | 0.2740 |
| <i>A. quadrididum</i> (CCF 5792)     | 0.0610                                    | 0.6752 | 0.1751 | 0.1377 |
| <i>T. erinacei</i> (CCF 5930)        | 0.1055                                    | 0.9009 | 0.4728 | 0.2019 |
| <i>A. gypseum</i> (CCF 6261)         | 0.9722                                    | 0.4822 | 0.9036 | 0.9905 |
| <i>A. currey</i> (CCF 5207)          | 0.0059                                    | 0.6008 | 0.0950 | 0.0443 |
| <i>A. insingulare</i> (CCF 5417)     | 0.0626                                    | 0.6375 | 0.1579 | 0.1377 |
